# Supplementary material for: Translational simulation: not ‘where?’ but ‘why?’ A functional view of in situ simulation
Source: PubMed Central journal article supplement (PMC5806247; doi:10.1186/s41077-017-0052-3), 2017-10-19
Supplement: 41077_2017_52_MOESM2_ESM.pdf [file 41077_2017_52_MOESM2_ESM.pdf]

---

**Type of simulation:** Simulation lab In-situ

---

**Location:****Date:**

---

**Scenario name:**

---

**Health service outcome target:**

---

**Scenario overview:**

---

**Additional information:**

---

**Participants:**

---

**Simulation faculty:**

---

**Issues identified in session and  
in debrief:****Safety and environment:**

---

**Performance** (*against benchmarks/targets*):

---

**Communication/interfaces:**

---

**Knowledge:**

---

---

**Further reflections:**

**Overall:**

---

**Strengths:**

---

**Weaknesses:**

---

**Opportunities:**

---

**Issues identified in simulation  
delivery:**

---

**Report provided to:**

---
